# Supplementary material
Source: Springer Nature journal article supplement (https://www.springermedizin.de/resource/supplementary/13023_2013_741_MOESM2_ESM.pdf/9642968)
Supplement: MOESM2 [file 9642968]

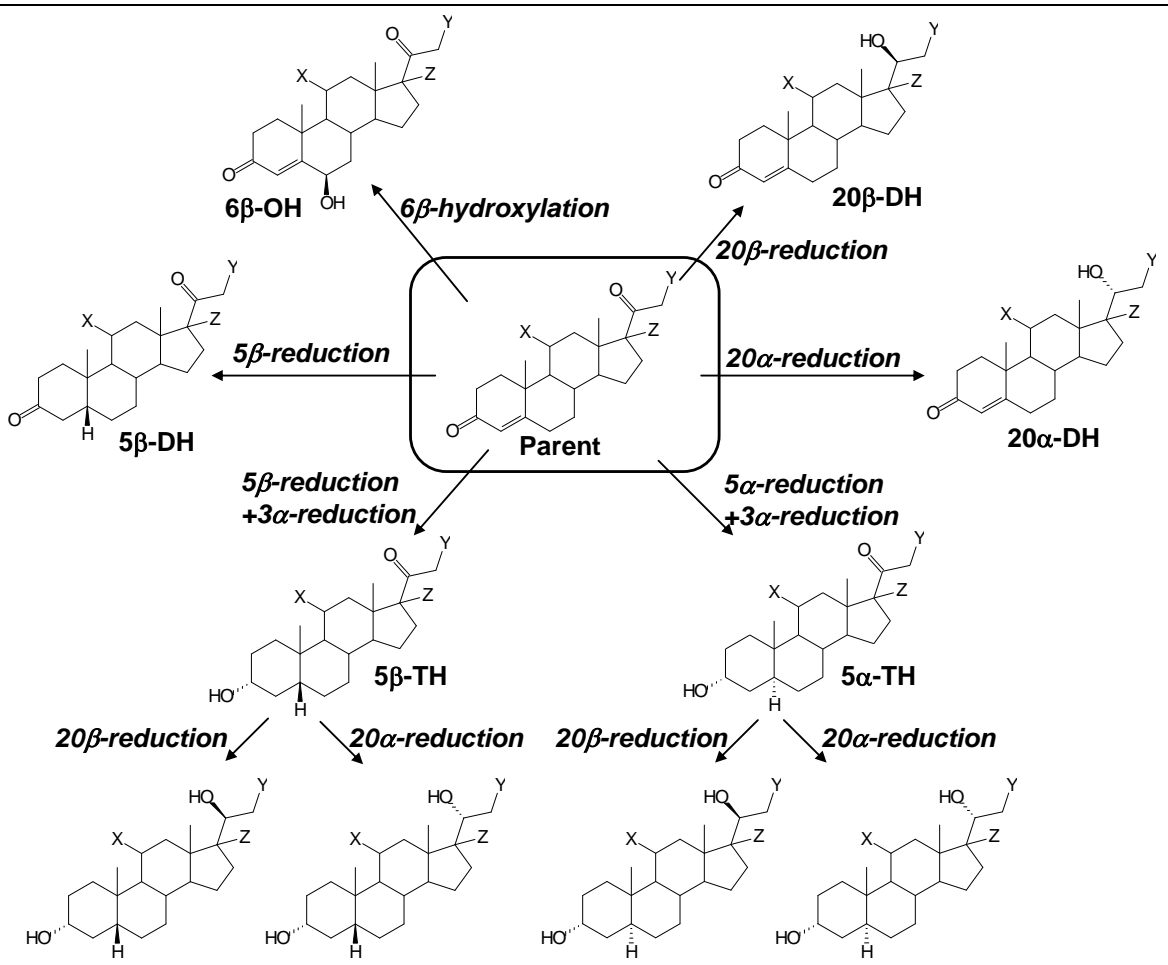

|   | 17OHP | DOC | S   | B   | A   | F   | E   |
|---|-------|-----|-----|-----|-----|-----|-----|
| X | -H    | -H  | -H  | -OH | =O  | -OH | =O  |
| Y | -H    | -OH | -OH | -OH | -OH | -OH | -OH |
| Z | -OH   | -H  | -OH | -H  | -H  | -OH | -OH |

|                                             | 17OHP                    | DOC         | S                 | B                 | A                    | F                                  | E                            |
|---------------------------------------------|--------------------------|-------------|-------------------|-------------------|----------------------|------------------------------------|------------------------------|
| Parent                                      | 17OHP<br><i>u</i> -17OHP | DOC         | S                 | B                 | A                    | F<br><i>u</i> -F                   | E<br><i>u</i> -E             |
| 6β-hydroxylation                            | <i>n.d.</i>              | <i>n.d.</i> | <i>n.d.</i>       | <i>u</i> -6βOH-B  | <i>n.d.</i>          | <i>u</i> -6βOH-F                   | <i>u</i> -6βOH-E             |
| 20β-reduction                               | <i>n.d.</i>              | <i>n.d.</i> | 20β-DHS           | 20β-DHB           | 20β-DHA              | 20β-DHF<br><i>u</i> -20β-DHF       | 20β-DHE<br><i>u</i> -20β-DHE |
| 20α-reduction                               | <i>u</i> -20α-DH17OHP    | <i>n.d.</i> | <i>n.d.</i>       | 20α-DHB           | 20α-DHA              | <i>u</i> -20α-DHF                  | 20α-DHE<br><i>u</i> -20α-DHE |
| 5β-reduction                                | <i>n.d.</i>              | <i>n.d.</i> | <i>n.d.</i>       | <i>n.d.</i>       | <i>n.d.</i>          | 5β-DHF                             | 5β-DHE                       |
| 5β-reduction + 3α-reduction                 | 17HP                     | 5β-THDOC    | 5β-THS            | 5β-THB            | 5β-THA               | 5β-THF                             | 5β-THE                       |
| 5α-reduction + 3α-reduction                 | <i>n.d.</i>              | 5α-THDOC    | <i>n.d.</i>       | 5α-THB            | 5α-THA               | 5α-THF                             | 5α-THE                       |
| 5β-reduction + 3α-reduction + 20β-reduction | PT                       | <i>n.d.</i> | β-deoxy-cortolone | 17-deoxy-β-cortol | 17-deoxy-β-cortolone | β,β-cortol                         | β-cortolone                  |
| 5α-reduction + 3α-reduction + 20β-reduction | <i>n.d.</i>              | <i>n.d.</i> | <i>n.d.</i>       | <i>n.d.</i>       | <i>n.d.</i>          | α,β-cortol                         | <i>n.d.</i>                  |
| 5β-reduction + 3α-reduction + 20α-reduction | <i>n.d.</i>              | <i>n.d.</i> | α-deoxy-cortolone | <i>n.d.</i>       | <i>n.d.</i>          | β,α-cortol<br><i>u</i> -β,α-cortol | α-cortolone                  |
| 5α-reduction + 3α-reduction + 20α-reduction | <i>n.d.</i>              | <i>n.d.</i> | <i>n.d.</i>       | <i>n.d.</i>       | <i>n.d.</i>          | α,α-cortol                         | <i>n.d.</i>                  |
